# Supplementary material
Source: PubMed Central journal article supplement (PMC5755394)
Supplement: NIHMS907401-supplement-7.pdf [file NIHMS907401-supplement-7.pdf]

Supplementary Table 1

| <b>Oligos used for qPCR</b> |                                     |
|-----------------------------|-------------------------------------|
| <b>Oligo</b>                | <b>Sequence (5'-3')</b>             |
| YAP1 FW                     | CCT TCT TCA AGC CGC CGG AG          |
| YAP1 REV                    | CAG TGT CCC AGG AGA AAC AGC         |
| CTGF FW                     | GCA GAG CCG CCT GTG CAT GG          |
| CTGF REV                    | GGT ATG TCT TCA TGC TGG             |
| GAPDH FW                    | ATG GGG AAG GTG AAG GTC G           |
| GAPDH REV                   | GGG GTC ATT GAT GGC AAC AAT A       |
| CYR61 FW                    | ATT GTA GAA AGG AAG CCT TGC TCA T   |
| CYR61 REV                   | TCC AAT CGT GGC TGC ATT AG          |
| OCT4 FW                     | GGG CTC TCC CAT GCA TTC AAA C       |
| OCT4 REV                    | CAC CTT CCC TCC AAC CAG TTG C       |
| NANOG FW                    | AGT CCC AAA GGC AAA CAA CCC ACT TC  |
| NANOG REV                   | TGC TGG AGG CTG AGG TAT TTC TGT CTC |
| SOX2 FW                     | TAC AGC ATG TCC TAC TCG CAG         |
| SOX2 REV                    | GAG GAA GAG GTA ACC ACA GGG         |
| JAG1 FW                     | GCT GAC TTA GAA TCC CTG TGT TA      |
| JAG1 REV                    | AGG GTA CTG TTG ACT AGC TTT         |
| PROM1 FW                    | TGG ATG CAG AAC TTG ACA ACG T       |
| PROM1 REV                   | ATA CCT GCT ACG ACA GTC GTG GT      |
| HEY1 FW                     | GTT CGG CTC TAG GTT CCA TGT         |
| HEY1 REV                    | CGT CGG CGC TTC TCA ATT ATT C       |
| DLL1 FW                     | GTG ATG AGC AGC ATG GAT T           |
| DLL1 REV                    | CAG CCT GGA TAG CGG ATA C           |
| RBPJ FW                     | CGC ATT ATT GGA TGC AGA TG          |
| RBPJ REV                    | CAG GAA GCG CCA TCA TTT AT          |
| HES1 FW                     | TCA ACA CGA CAC CGG ATA AAC         |
| HES1 REV                    | GCC GCG AGC TAT CTT TCT TCA         |
| WWTR1 FW                    | GGC TGG GAG ATG ACC TTC AC          |
| WWTR1 REV                   | CTG AGT GGG GTG GTT CTG CT          |

| <b>Oligos used for semi-quantitative RT-PCR</b> |                             |
|-------------------------------------------------|-----------------------------|
| <b>Oligo</b>                                    | <b>Sequence (5'-3')</b>     |
| NOTCH1 FW                                       | GCC GCC TTT GTG CTT CTG TTC |
| NOTCH1 REV                                      | CCG GTG GTC TGT CTG GTC GTC |
| NOTCH3 FW                                       | TCT TGC TGC TGG TCA TTC TC  |
| NOTCH3 REV                                      | TGC CTC ATC CTC TTC AGT TG  |
| GAPDH FW                                        | GAG AGA CCC TCA CTG CTG     |
| GAPDH REV                                       | GAT GGT ACA TGA CAA GGT GC  |

| <b>Oligos used for ChIP-PCR</b> |                                   |
|---------------------------------|-----------------------------------|
| <b>Oligo</b>                    | <b>Sequence (5'-3')</b>           |
| HES1 FW                         | CGT GTC TCC TCC TCC CAT T         |
| HES1 REV                        | GGC CTC TAT ATA TAT CTG GGA CTG C |
| Negative FW                     | GTG GGC CTT TGG AAT ATC CT        |
| Negative REV                    | GAC CTT GGC TGT GTT GTC CT        |

|          |                                |
|----------|--------------------------------|
| YAP FW   | GGG AAT GCC AGC TGA TGT CTA    |
| YAP REV  | GCA AGG CAC ATC CCT TGA AAA TA |
| SOX2 FW  | CCT GCC ATG TCG CCA GTT CCT    |
| SOX2 REV | CCT CGC GCA CAC AAA GGC ACG    |
